# Supplementary material for: Genome-Wide Identification and Characterization of Chinese Cabbage S1fa Transcription Factors and Their Roles in Response to Salt Stress
Source: MDPI journal article supplement (doi:10.3390/antiox11091782), 2022-09-09
Supplement: s1 [file s1]

**Supplementary Table. S1** Chinese cabbage S1fa family genes cis-elements

| Motif name      | Function                                                             | Bra034084 | Bra003132 | Bra006994 | Bra029784 |
|-----------------|----------------------------------------------------------------------|-----------|-----------|-----------|-----------|
| GATA-motif      | Part of a light responsive element                                   | 1         | 0         | 0         | 0         |
| LTR             | Cis-acting element involved in low-temperature responsiveness        | 1         | 1         | 1         | 0         |
| TC-rich repeats | Cis-acting element involved in defense and stress responsiveness     | 1         | 0         | 0         | 2         |
| TCA-element     | Cis-acting element involved in salicylic acid responsiveness         | 1         | 0         | 1         | 1         |
| CGTCA-motif     | Cis-acting regulatory element involved in the MeJa-responsiveness    | 1         | 2         | 0         | 0         |
| ARE             | Cis-acting regulatory element essential for the anaerobic induction  | 3         | 3         | 1         | 1         |
| GT1-motif       | Light responsive element                                             | 1         | 0         | 0         | 0         |
| TCT-motif       | Part of a light responsive element                                   | 3         | 0         | 2         | 0         |
| TGACG-motif     | Cis-acting regulatory element involved in the meja-responsiveness    | 1         | 2         | 0         | 0         |
| MBS             | MYB binding site involved in drought-inducibility                    | 3         | 3         | 0         | 2         |
| AE-box          | Part of a module for light response                                  | 2         | 1         | 0         | 1         |
| ABRE            | Cis-acting element involved in the abscisic acid responsiveness      | 0         | 4         | 2         | 2         |
| G-Box           | Cis-acting regulatory element involved in light responsiveness       | 0         | 6         | 3         | 1         |
| TGA-element     | Auxin-responsive element                                             | 0         | 2         | 0         | 0         |
| CAT-box         | Cis-acting regulatory element related to meristem expression         | 0         | 1         | 0         | 0         |
| TCCC-motif      | Part of a light responsive element                                   | 0         | 1         | 0         | 0         |
| TCT-motif       | Part of a light responsive element                                   | 0         | 1         | 2         | 2         |
| LAMP-element    | Part of a light responsive element                                   | 0         | 1         | 0         | 0         |
| Box II          | Part of a light responsive element                                   | 0         | 0         | 1         | 1         |
| O2-site         | Cis-acting regulatory element involved in zein metabolism regulation | 0         | 0         | 3         | 0         |
| CAT-box         | Cis-acting regulatory element related to meristem expression         | 0         | 0         | 1         | 0         |
| TC-rich repeats | Cis-acting element involved in defense and stress responsiveness     | 0         | 0         | 1         | 0         |
| chs-Unit 1 ml   | Part of a light responsive element                                   | 0         | 0         | 0         | 1         |
