# Supplementary material for: Genome-Wide Identification and Characterization of Chinese Cabbage S1fa Transcription Factors and Their Roles in Response to Salt Stress
Source: Antioxidants (Basel). 2022 Sep 9;11(9):1782. doi: 10.3390/antiox11091782 (PMC9495863; doi:10.3390/antiox11091782)
Supplement: Supplementary file 1 [file antioxidants-11-01782-s001.zip › Primer supplimentry files.xlsx]

## Sheet: Sheet1
				Primer used in this study
			Primer name	PCR primer
			Bra003132-F	ATGGATGGAGAAGGTTTCGCC
			Bra003132-R	TTATTCTCCAGGCACAGGGAC
			Bra006994-F	ATGGACGGCGAAGATTTTGC
			Bra006994-R	TTATTCTCCAGGCACGGAGAC
			Bra029784-F	ATGGCCGATGAGTTCTCTGG
			Bra029784-R	CTACTCGCCAGGAACTTGAACG
			Bra034084-F	ATGAAACAGGGAAAAATAGAGAGCAAAG
			Bra034084-R	CTACTCGCCAGGAACTTGAACT
			Primer name	Gene cloning primer
			pRS-Bra003132-F	caaatctagaactagATGGATGGAGAAGGTTTCGC
			pRS-Bra003132-R	cgggggatccactaggTTCTCCAGGCACAGGGACTC
			pRS-Bra006994-F	caaatctagaactagATGGACGGCGAAGATTTTGC
			pRS-Bra006994-F	cgggggatccactaggTTCTCCAGGCACGGAGACTC
			pRS-Bra029784-F	caaatctagaactagATGGCCGATGAGTTCTCTGG
			pRS-Bra029784-R	cgggggatccactaggCTCGCCAGGAACTTGAAC
			pRS-Bra034084-F	caaatctagaactagATGAAACAGGGAAAAATAGAGAGCAAAG
			pRS-Bra034084-R	cgggggatccactaggCTCGCCAGGAACTTGAAC
			Primer name	Chinese cabbage qRT-PCR primer
			Bra003132-RT-F	GGTTTCGCCGGAAAGGTATC
			Bra003132-RT-R	GTCCCGGGTTCAATCCTTTG
			Bra006994-RT-F	GCTGCTGAAGCCAAAGGAAT
			Bra006994-RT-R	GACAAGGAGCCCAACAAGTG
			Bra029784-RT-F	GGACTGATCGTCCTTCTCGT
			Bra029784-RT-R	GGAAACGGGCTTCTTCTTCC
			Bra034084-RT-F	CCTTCTTGTGATCGGAGGGT
			Bra034084-RT-R	TCTGCGCGTATGTGTAGAGT
			Bra-Action-RT-F	ATACCAGGCTTGAGCATACCG
			Bra-Action-RT-R	GCCAAAGAGGCCATCAGACAA
			Primer name	Yeast qRT-PCR primer
			Mkk1p-RT-F	CCCAGAACCACTGACCTCTT
			Mkk1p-RT-R	GGTACGAGTTCGGGTAGTGT
			Mkk2p-RT-F	GTTGAAACGTGGCGGTAGAA
			Mkk2p-RT-R	CACTGACACCGAAATCGCAT
			RLM1-RT-F	GCTCAAAGACAAACCCAGCA
			RLM1-RT-R	CTTCGATGGCAGTGAACCAG
			Rom2-RT-F	CCAACGTTGACAGCTTAGGG
			Rom2-RT-R	AGGCAGCAGCTGAGAACTTA
			SDP1-RT-F	CGAACATCGCACCAAAGAGT
			SDP1-RT-R	GCACGAATTCACGGTCTTCA
			Ptc1-RT-F	GGGAGCTTCCGGATTCAGTT
			Ptc1-RT-R	TATCAGGCCACCTGCTTGTT
			Bck1-RT-F	TTAGAAGTCGTCGCAGCCAT
			Bck1-RT-R	AAGAAGCTCGTTAGCGGTTG
			Cha1-RT-F	GCTGCAACAGCATGTCAAAG
			Cha1-RT-R	GGGCTCAATGACCTGAGAGT
			Hsp12-RT-F	AAGGTCGCTGGTAAGGTTCA
			Hsp12-RT-R	TGGACACGACCGGAAACATA
			SED1-RT-F	CCACTTTCACCACAAACGGT
			SED1-RT-R	GGTTGATGTGGTTGTTGGCT
			YLR194C-RT-F	AAACTAGCAACGTCGTCAGC
			YLR194C-R	TTACGGCAGAGTTGCTTTCG
			PST1-RT-F	CACCATTGGCCAAACCTTCA
			PST1-RT-R	AGGTTGTCGAGACCACCAAT
			CRH1-RT-F	ATTGAATGGGTGGGTGGTGA
			CRH1-RT-R	TCCATCGAGGTACCAAGTCG
			Ccw14-RT-F	AGACTCCATCTGCCCAAACA
			Ccw14-RT-R	GGAATCGCCCAATGAAGCAT
			CWP2-RT-F	TCTCTACTGTCGCTTCCGTT
			CWP2-RT-R	TTCGGTGGTAGCAGTGGTAG
			Yeast Actin-RT-F	ATATTCCAGGATCAGGTCTTCCGTAGC
			Yeast Actin-RT-R	GTAGTCTTCTCATTCTGTTGATGTTGTTGTTG
